# Supplementary material for: Bacterial repetitive extragenic palindromic sequences are DNA targets for Insertion Sequence elements
Source: Springer Nature journal article supplement (doi:10.1186/1471-2164-7-62), 2006-03-24
Supplement: Additional file 1 [file 1471-2164-7-62-s1.pdf]

| 1                                      | REP fragments                                                                                                                                                                                                                                                | DR | Left End | orf A | 130 |
|----------------------------------------|--------------------------------------------------------------------------------------------------------------------------------------------------------------------------------------------------------------------------------------------------------------|----|----------|-------|-----|
| IS8-1                                  | TGA <b>AAAAC</b> TTC <b>CGCACG</b> CAGTTGAG <b>GTTA</b> <b>TCGTTCC</b> T <b>CACGCTC</b> <b>CAG</b> TGGACTGCCCCAAGAAGTTGGACACCAATCCGACCTAATGGGGGTGTTCAA <b>ATGGCCAAGTATTCAGAGCAATTC</b> AAAGCT                                                                |    |          |       |     |
| IS8-2                                  | <b>CACGATAG</b> TT <b>ACGCTT</b> TA <b>GC</b> TC <b>CAGACAC</b> CTG- <b>TCGTTC</b> CC <b>TACGCT</b> <b>CTG</b> TGGACTGCCCCAAGAAGTTGGACACCAATCCGACCTAATGGGGGTGTTCAA <b>ATGGCCAAGTATTCAGAGCAATTC</b> AAAGCT                                                    |    |          |       |     |
| IS8-3                                  | TCTTCGCGAACAGTTTCGCTCCCACAGGG <b>CCATGTGTGCCCGT</b> <b>AAA</b> TGGACTGCCCCAAGAAGTTGGACACCAATCCGACCTAATGGGGGTGTTCAA <b>ATGGCCAAGTATTCAGAGCAATTC</b> AAAGCT                                                                                                    |    |          |       |     |
| IS8-4                                  | <b>CGCTCAG</b> CT <b>CATACG</b> CA <b>CTCTG</b> AAAGAG- <b>CCC</b> G <b>AAA</b> AGCT <b>TGG</b> TTT <b>TGG</b> ACTGCCCCAAGAAGTTGGACACCAATCCGACCTAATGGGGGTGTTCAA <b>ATGGCCAAGTATTCAGAGCAATTC</b> AAAGCT                                                       |    |          |       |     |
| IS8-5                                  | <b>CGGTCCT</b> CT <b>TCG</b> <b>CGAC-TC</b> AGAG <b>CGTCG</b> AGAG <b>CTGC</b> ATT <b>CCC</b> AC <b>CGG</b> TGGACTGCCCCAAGAAGTTGGACACCAATCCGACCTAATGGGGGTGTTCAA <b>ATGGCCAAGTATTCAGAGCAATTC</b> AAAGCT                                                       |    |          |       |     |
| Consensus                              | <b>cgC</b> g <b>aaacc</b> T <b>aC</b> g <b>ac</b> ac <b>aaC</b> t <b>c</b> g <b>aa</b> ag <b>gggc</b> <b>CgT</b> g <b>caT</b> c <b>aC</b> g <b>ctc</b> ag <b>TGG</b> ACTGCCCCAAGAAGTTGGACACCAATCCGACCTAATGGGGGTGTTCAA <b>ATGGCCAAGTATTCAGAGCAATTC</b> AAAGCT |    |          |       |     |
| <b>131 orf A 260</b>                   |                                                                                                                                                                                                                                                              |    |          |       |     |
| IS8-1                                  | <b>CACCGTC</b> GTCAAAGCCTATCTTGCAGGCAACATAGGCTTT <b>CG</b> AAAGGTG <b>TCC</b> AGCCAGTTCTCGATCGATTCCAGCCTGCTTCGACGCTGGGTCGCCAATTACAAGAGCCATGGGCACACAGGCCATCGT                                                                                                 |    |          |       |     |
| IS8-2                                  | <b>CACCGTC</b> GTCAAAGCCTATCTTGCAGGCAACATAGGCTTT <b>CG</b> AAAGGTG <b>TCC</b> AGCCAGTTCTCGATCGATTCCAGCCTGCTTCGACGCTGGGTCGCCAATTACAAGAGCCATGGGCACACAGGCCATCGT                                                                                                 |    |          |       |     |
| IS8-3                                  | <b>CACCGTC</b> GTCAAAGCCTATCTTGCAGGCAACATAGGCTTT <b>CG</b> AAAGGTG <b>TCC</b> AGCCAGTTCTCGATCGATTCCAGCCTGCTTCGACGCTGGGTCGCCAATTACAAGAGCCATGGGCACACAGGCCATCGT                                                                                                 |    |          |       |     |
| IS8-4                                  | <b>CACCGTC</b> GTCAAAGCCTATCTTGCAGGCAACATAGGCTTT <b>CG</b> AAAGGTG <b>TCC</b> AGCCAGTTCTCGATCGATTCCAGCCTGCTTCGACGCTGGGTCGCCAATTACAAGAGCCATGGGCACACAGGCCATCGT                                                                                                 |    |          |       |     |
| IS8-5                                  | <b>CACCGTC</b> GTCAAAGCCTATCTTGCAGGCAACATAGGCTTT <b>CG</b> AAAGGTG <b>TCC</b> AGCCAGTTCTCGATCGATTCCAGCCTGCTTCGACGCTGGGTCGCCAATTACAAGAGCCATGGGCACACAGGCCATCGT                                                                                                 |    |          |       |     |
| Consensus                              | <b>CACCGTC</b> GTCAAAGCCTATCTTGCAGGCAACATAGGCTTT <b>CG</b> AAAGGTG <b>TCC</b> AGCCAGTTCTCGATCGATTCCAGCCTGCTTCGACGCTGGGTCGCCAATTACAAGAGCCATGGGCACACAGGCCATCGT                                                                                                 |    |          |       |     |
| <b>261 orf A 390</b>                   |                                                                                                                                                                                                                                                              |    |          |       |     |
| IS8-1                                  | <b>AAGCCTGG</b> TCTTCGGTACAGCGAAGCCTTCAAACGCTCAGTGCTGGAGCACAAGCGCGAGCACGGGCTGTCCCTTCGCCAGACCGCAGCGCATTTTGGTATTGGTGATCCTGGCCAAATAGTCATTTGGG                                                                                                                   |    |          |       |     |
| IS8-2                                  | <b>AAGCCTGG</b> TCTTCGGTACAGCGAAGCCTTCAAACGCTCAGTGCTGGAGCACAAGCGCGAGCACGGGCTGTCCCTTCGCCAGACCGCAGCGCATTTTGGTATTGGTGATCCTGGCCAAATAGTCATTTGGG                                                                                                                   |    |          |       |     |
| IS8-3                                  | <b>AAGCCTGG</b> TCTTCGGTACAGCGAAGCCTTCAAACGCTCAGTGCTGGAGCACAAGCGCGAGCACGGGCTGTCCCTTCGCCAGACCGCAGCGCATTTTGGTATTGGTGATCCTGGCCAAATAGTCATTTGGG                                                                                                                   |    |          |       |     |
| IS8-4                                  | <b>AAGCCTGG</b> TCTTCGGTACAGCGAAGCCTTCAAACGCTCAGTGCTGGAGCACAAGCGCGAGCACGGGCTGTCCCTTCGCCAGACCGCAGCGCATTTTGGTATTGGTGATCCTGGCCAAATAGTCATTTGGG                                                                                                                   |    |          |       |     |
| IS8-5                                  | <b>AAGCCTGG</b> TCTTCGGTACAGCGAAGCCTTCAAACGCTCAGTGCTGGAGCACAAGCGCGAGCACGGGCTGTCCCTTCGCCAGACCGCAGCGCATTTTGGTATTGGTGATCCTGGCCAAATAGTCATTTGGG                                                                                                                   |    |          |       |     |
| Consensus                              | <b>AAGCCTGG</b> TCTTCGGTACAGCGAAGCCTTCAAACGCTCAGTGCTGGAGCACAAGCGCGAGCACGGGCTGTCCCTTCGCCAGACCGCAGCGCATTTTGGTATTGGTGATCCTGGCCAAATAGTCATTTGGG                                                                                                                   |    |          |       |     |
| <b>391 orf A 520</b>                   |                                                                                                                                                                                                                                                              |    |          |       |     |
| IS8-1                                  | <b>AACAGCAG</b> CATTACAGTAACGATCTAGCCCCCTACGTTCCCAAGAGAAGAAAGTCTGTTGCCATGCCCAAGAAGCCTTATCCACCGCACCAGTAATCGACGACGATACGCAGAAGACGCGTGACCAGTT                                                                                                                    |    |          |       |     |
| IS8-2                                  | <b>AACAGCAG</b> CATTACAGTAACGATCTAGCCCCCTACGTTCCCAAGAGAAGAAAGTCTGTTGCCATGCCCAAGAAGCCTTATCCACCGCACCAGTAATCGACGACGATACGCAGAAGACGCGTGACCAGTT                                                                                                                    |    |          |       |     |
| IS8-3                                  | <b>AACAGCAG</b> CATTACAGTAACGATCTAGCCCCCTACGTTCCCAAGAGAAGAAAGTCTGTTGCCATGCCCAAGAAGCCTTATCCACCGCACCAGTAATCGACGACGATACGCAGAAGACGCGTGACCAGTT                                                                                                                    |    |          |       |     |
| IS8-4                                  | <b>AACAGCAG</b> CATTACAGTAACGATCTAGCCCCCTACGTTCCCAAGAGAAGAAAGTCTGTTGCCATGCCCAAGAAGCCTTATCCACCGCACCAGTAATCGACGACGATACGCAGAAGACGCGTGACCAGTT                                                                                                                    |    |          |       |     |
| IS8-5                                  | <b>AACAGCAG</b> CATTACAGTAACGATCTAGCCCCCTACGTTCCCAAGAGAAGAAAGTCTGTTGCCATGCCCAAGAAGCCTTATCCACCGCACCAGTAATCGACGACGATACGCAGAAGACGCGTGACCAGTT                                                                                                                    |    |          |       |     |
| Consensus                              | <b>AACAGCAG</b> CATTACAGTAACGATCTAGCCCCCTACGTTCCCAAGAGAAGAAAGTCTGTTGCCATGCCCAAGAAGCCTTATCCACCGCACCAGTAATCGACGACGATACGCAGAAGACGCGTGACCAGTT                                                                                                                    |    |          |       |     |
| <b>521 orf A Intergenic region 650</b> |                                                                                                                                                                                                                                                              |    |          |       |     |
| IS8-1                                  | <b>AATGGCCG</b> AGCTCGAATACCTGCGCATGGAGAACGCTTACCTAAAAAAGTTGGAAGAGTTGAAGGAGCAGCAACGACGGCAAAGAAAAAGCCCTGATCGTCAAACAAC <b>TGAGGAGCCGCTTCTCGCTCT</b>                                                                                                            |    |          |       |     |
| IS8-2                                  | <b>AATGGCCG</b> AGCTCGAATACCTGCGCATGGAGAACGCTTACCTAAAAAAGTTGGAAGAGTTGAAGGAGCAGCAACGACGGCAAAGAAAAAGCCCTGATCGTCAAACAAC <b>TGAGGAGCCGCTTCTCGCTCT</b>                                                                                                            |    |          |       |     |
| IS8-3                                  | <b>AATGGCCG</b> AGCTCGAATACCTGCGCATGGAGAACGCTTACCTAAAAAAGTTGGAAGAGTTGAAGGAGCAGCAACGACGGCAAAGAAAAAGCCCTGATCGTCAAACAAC <b>TGAGGAGCCGCTTCTCGCTCT</b>                                                                                                            |    |          |       |     |
| IS8-4                                  | <b>AATGGC</b> AGAGCTCGAATACCTGCGCATGGAGAACGCTTACCTAAAAAAGTTGGAAGAGTTGAAGGAGCAGCAACGACGGCAAAGAAAAAGCCCTGATCGTCAAACAAC <b>TGAGGAGCCGCTTCTCGCTCT</b>                                                                                                            |    |          |       |     |
| IS8-5                                  | <b>AATGGCCG</b> AGCTCGAATACCTGCGCATGGAGAACGCTTACCTAAAAAAGTTGGAAGAGTTGAAGGAGCAGCAACGACGGCAAAGAAAAAGCCCTGATCGTCAAACAAC <b>TGAGGAGCCGCTTCTCGCTCT</b>                                                                                                            |    |          |       |     |
| Consensus                              | <b>AATGGCCG</b> AGCTCGAATACCTGCGCATGGAGAACGCTTACCTAAAAAAGTTGGAAGAGTTGAAGGAGCAGCAACGACGGCAAAGAAAAAGCCCTGATCGTCAAACAAC <b>TGAGGAGCCGCTTCTCGCTCT</b>                                                                                                            |    |          |       |     |
| <b>651 Intergenic region orf B 780</b> |                                                                                                                                                                                                                                                              |    |          |       |     |
| IS8-1                                  | <b>GCGCCCTT</b> CTGACGCTGGCGGGCT <b>TGG</b> CGCGCAGTACGTTCTACTATCAGGTT <b>CC</b> AGGTG <b>CAATCC</b> AGACCGGATCCAGATGCTGCTCTAAAGCAGGAGGTAGAGCGGATTTATCAGGAGAGAGGGTCT                                                                                         |    |          |       |     |

IS8-2 GCGCCCTTCTGACGCTGGCGGGCTTGGCGCGCAGTACGTTCTACTATCAGGTTTCAGGTGCAATCCAGACCCGATCCAGATGCTGCTCTAAAGCAGGAGGTAGAGCGGATTTATCACGAGGAGAGAGGTC  
IS8-3 GCGCCCTTCTGACGCTGGCGGGCTTGGCGCGCAGTACGTTCTACTATCAGGTTTCAGGTGCAATCCAGACCCGATCCAGATGCTGCTCTAAAGCAGGAGGTAGAGCGGATTTATCACGAGGAGAGAGGTC  
IS8-4 GCGCCCTTCTGACGCTGGCGGGCTTGGCGCGCAGTACGTTCTACTATCAGGTTTCAGGTGCAATCCAGACCCGATCCAGATGCTGCTCTAAAGCAGGAGGTAGAGCGGATTTATCACGAGGAGAGAGGTC  
IS8-5 GCGCCCTTCTGACGCTGGCGGGCTTGGCGCGCAGTACGTTCTACTATCAGGTTTCAGGTGCAATCCAGACCCGATCCAGATGCTGCTCTAAAGCAGGAGGTAGAGCGGATTTATCACGAGGAGAGAGGTC  
Consensus GCGCCCTTCTGACGCTGGCGGGCTTGGCGCGCAGTACGTTCTACTATCAGGTTTCAGGTGCAATCCAGACCCGATCCAGATGCTGCTCTAAAGCAGGAGGTAGAGCGGATTTATCACGAGGAGAGAGGTC

781 orf B 910

IS8-1 TTATGGGGCTCGGCGCATCACAGCGGTTATCCGCAACTCAGGCACGCTGGTCAACAAGAAGGTTGTGGAGAGATTGATGGCTGAACTGGGTCTGCGCTCCGTTGTTTCGACCAAAAAAATACCGTTCCTAT  
IS8-2 TTATGGGGCTCGGCGCATCACAGCGGTTATCCGCAACTCAGGCACGCTGGTCAACAAGAAGGTTGTGGAGAGATTGATGGCTGAACTGGGTCTGCGCTCCGTTGTTTCGACCAAAAAAATACCGTTCCTAT  
IS8-3 TTATGGGGCTCGGCGCATCACAGCGGTTATCCGCAACTCAGGCACGCTGGTCAACAAGAAGGTTGTGGAGAGATTGATGGCTGAACTGGGTCTGCGCTCCGTTGTTTCGACCAAAAAAATACCGTTCCTAT  
IS8-4 TTATGGGGCTCGGCGCATCACAGCGGTTATCCGCAACTCAGGCACGCTGGTCAACAAGAAGGTTGTGGAGAGATTGATGGCTGAACTGGGTCTGCGCTCCGTTGTTTCGACCAAAAAAATACCGTTCCTAT  
IS8-5 TTATGGGGCTCGGCGCATCACAGCGGTTATCCGCAACTCAGGCACGCTGGTCAACAAGAAGGTTGTGGAGAGATTGATGGCTGAACTGGGTCTGCGCTCCGTTGTTTCGACCAAAAAAATACCGTTCCTAT  
Consensus TTATGGGGCTCGGCGCATCACAGCGGTTATCCGCAACTCAGGCACGCTGGTCAACAAGAAGGTTGTGGAGAGATTGATGGCTGAACTGGGTCTGCGCTCCGTTGTTTCGACCAAAAAAATACCGTTCCTAT

911 orf B 1040

IS8-1 AAGGGCACCGTCGGAAAAATTCACCGAATTTGCTGGAGCGCAATTCACGGCGCAACGCCGAACCAGAAATGGGTGACCGATGTGACCGAGTTTAAAGTGGCCAATCGAAAGCTGTATCTCTCGCCTG  
IS8-2 AAGGGCACCGTCGGAAAAATTCACCGAATTTGCTGGAGCGCAATTCACGGCGCAACGCCGAACCAGAAATGGGTGACCGATGTGACCGAGTTTAAAGTGGCCAATCGAAAGCTGTATCTCTCGCCTG  
IS8-3 AAGGGCACCGTCGGAAAAATTCACCGAATTTGCTGGAGCGCAATTCACGGCGCAACGCCGAACCAGAAATGGGTGACCGATGTGACCGAGTTTAAAGTGGCCAATCGAAAGCTGTATCTCTCGCCTG  
IS8-4 AAGGGCACCGTCGGAAAAATTCACCGAATTTGCTGGAGCGCAATTCACGGCGCAACGCCGAACCAGAAATGGGTGACCGATGTGACCGAGTTTAAAGTGGCCAATCGAAAGCTGTATCTCTCGCCTG  
IS8-5 AAGGGCACCGTCGGAAAAATTCACCGAATTTGCTGGAGCGCAATTCACGGCGCAACGCCGAACCAGAAATGGGTGACCGATGTGACCGAGTTTAAAGTGGCCAATCGAAAGCTGTATCTCTCGCCTG  
Consensus AAGGGCACCGTCGGAAAAATTCACCGAATTTGCTGGAGCGCAATTCACGGCGCAACGCCGAACCAGAAATGGGTGACCGATGTGACCGAGTTTAAAGTGGCCAATCGAAAGCTGTATCTCTCGCCTG

1041 orf B 1170

IS8-1 TGATGGACCTGTACAACGGTGAGATCGTGGCGTACGAATTTGCTACCAGGCCGTGCTTTGAGCTGGTCACCAGTATGCTGGACAAGGCGTTGCAGCAGTTGCAAGACGAGCCGAAGCTTGTGATGCACTC  
IS8-2 TGATGGACCTGTACAACGGTGAGATCGTGGCGTACGAATTTGCTACCAGGCCGTGCTTTGAGCTGGTCACCAGTATGCTGGACAAGGCGTTGCAGCAGTTGCAAGACGAGCCGAAGCTTGTGATGCACTC  
IS8-3 TGATGGACCTGTACAACGGTGAGATCGTGGCGTACGAATTTGCTACCAGGCCGTGCTTTGAGCTGGTCACCAGTATGCTGGACAAGGCGTTGCAGCAGTTGCAAGACGAGCCGAAGCTTGTGATGCACTC  
IS8-4 TGATGGACCTGTACAACGGTGAGATCGTGGCGTACGAATTTGCTACCAGGCCGTGCTTTGAGCTGGTCACCAGTATGCTGGACAAGGCGTTGCAGCAGTTGCAAGACGAGCCGAAGCTTGTGATGCACTC  
IS8-5 TGATGGACCTGTACAACGGTGAGATCGTGGCGTACGAATTTGCTACCAGGCCGTGCTTTGAGCTGGTCACCAGTATGCTGGACAAGGCGTTGCAGCAGTTGCAAGACGAGCCGAAGCTTGTGATGCACTC  
Consensus TGATGGACCTGTACAACGGTGAGATCGTGGCGTACGAATTTGCTACCAGGCCGTGCTTTGAGCTGGTCACCAGTATGCTGGACAAGGCGTTGCAGCAGTTGCAAGACGAGCCGAAGCTTGTGATGCACTC

1171 orf B 1300

IS8-1 GGATCAAGGCTGGCAGTATCAACACGCGCAGTACCGTCAGAAACTGGCGGCAAAGGGTGTGAAGCAAAGCATGTCTCGTAAGGGAATTCGCTGGACAACGCTGCGATGGAAAGCTTTTTTGGTACGCTT  
IS8-2 GGATCAAGGCTGGCAGTATCAACACGCGCAGTACCGTCAGAAACTGGCGGCAAAGGGTGTGAAGCAAAGCATGTCTCGTAAGGGAATTCGCTGGACAACGCTGCGATGGAAAGCTTTTTTGGTACGCTT  
IS8-3 GGATCAAGGCTGGCAGTATCAACACGCGCAGTACCGTCAGAAACTGGCGGCAAAGGGTGTGAAGCAAAGCATGTCTCGTAAGGGAATTCGCTGGACAACGCTGCGATGGAAAGCTTTTTTGGTACGCTT  
IS8-4 GGATCAAGGCTGGCAGTATCAACACGCGCAGTACCGTCAGAAACTGGCGGTAAGGGTGTGAAGCAAAGCATGTCTCGTAAGGGAATTCGCTGGACAACGCTGCGATGGAAAGCTTTTTTGGTACGCTT  
IS8-5 GGATCAAGGCTGGCAGTATCAACACGCGCAGTACCGTCAGAAACTGGCGGCAAAGGGTGTGAAGCAAAGCATGTCTCGTAAGGGAATTCGCTGGACAACGCTGCGATGGAAAGCTTTTTTGGTACGCTT  
Consensus GGATCAAGGCTGGCAGTATCAACACGCGCAGTACCGTCAGAAACTGGCGGCAAAGGGTGTGAAGCAAAGCATGTCTCGTAAGGGAATTCGCTGGACAACGCTGCGATGGAAAGCTTTTTTGGTACGCTT

1301 orf B 1430

IS8-1 AAGTCCGAGTTTTTCTACTTGAAACGATTTGAAAGCATAGAAGAGCTGACGGCAGGTCTGGAGGAGTACATCCGCTACTACAACCATGACCGCATTAAGCTGAAGCTAGGCGGCCTGAGCCCCGTAAAAT  
IS8-2 AAGTCCGAGTTTTTCTACTTGAAACGATTTGAAAGCATAGAAGAGCTGACGGCAGGTCTGGAGGAGTACATCCGCTACTACAACCATGACCGCATTAAGCTGAAGCTAGGCGGCCTGAGCCCCGTAAAAT  
IS8-3 AAGTCCGAGTTTTTCTACTTGAAACGATTTGAAAGCATAGAAGAGCTGACGGCAGGTCTGGAGGAGTACATCCGCTACTACAACCATGACCGCATTAAGCTGAAGCTAGGCGGCCTGAGCCCCGTAAAAT  
IS8-4 AAGTCCGAGTTTTTCTACTTGAAACGATTTGAAAGCATAGAAGAGCTGACGGCAGGTCTGGAGGAGTACATCCGCTACTACAACCATGACCGCATTAAGCTGAAGCTAGGCGGCCTGAGCCCCGTAAAAT  
IS8-5 AAGTCCGAGTTTTTCTACTTGAAACGATTTGAAAGCATAGAAGAGCTGACGGCAGGTCTGGAGGAGTACATCCGCTACTACAACCATGACCGCATTAAGCTGAAGCTAGGCGGCCTGAGCCCCGTAAAAT

Consensus AAGTCCGAGTTTTTCTACTTGAAACGATTTGAAAGCATAGAAGAGCTGACGGCAGGTCTGGAGGAGTACATCCGCTACTACAACCATGACCGCATTAAAGCTGAAGCTAGGCGGCCTGAGCCCCGTAAAAAT

1431 orf B Right End DR REP fragments 1555

IS8-1 ACAGGACTCAGGCGGCAAGCTAAAACTGTCCAACCTCCGGGGGGCAGTCCA CAGCGTAGGAATGCCGTGGGTGACGCTCTGCGTCA CAAATCTGCGCTGCGCCGCATACTCAAGACCGGACGC  
IS8-2 ACAGGACTCAGGCGGCAAGCTAAAACTGTCCAACCTCCGGGGGGCAGTCCA CTGCGTGGGAATGCCTTGCGTGACGCTCCGCGTCA CAGGTTTGGCAGCGTCGCCGATAGTGCAAGGCGAT  
IS8-3 ACAGGACTCAGGCGGCAAGCTAAAACTGTCCAACCTCCGGGGGGCAGTCCA AAAATGTGGGAGTGACCGGGGCGCGATCCGCATTG CTCACGAAGAGGCCGTGCAGCCGCTGATGTATCAG  
IS8-4 ACAGGACTCAGGCGGCAAGCTAAAACTGTCCAACCTCCGGGGGGCAGTCCA TTTTGTGGGAGTGGACTTGTCCGCGAT--GGTTGCGAAGCGGCCCTAAACCAGACGACTTGGTTGCGCCT  
IS8-5 ACAGGACTCAGGCGGCAAGCTAAAACTGTCCAACCTCCGGGGGGCAGTCCA CCGGGGGCGTA-GGGAACCATAGCCCTGACTATCGTGCTGAAATTCTGTGTGGATATGCTGATCTCAACTAT  
Consensus ACAGGACTCAGGCGGCAAGCTAAAACTGTCCAACCTCCGGGGGGCAGTCCA cagcGTGGGAaTGccctgGgtggCGcTccGcgTcgCaaagcagcgCtgcGcCGcaacacctGatcgacct.
