# Supplementary material for: Bacterial repetitive extragenic palindromic sequences are DNA targets for Insertion Sequence elements
Source: Springer Nature journal article supplement (doi:10.1186/1471-2164-7-62), 2006-03-24
Supplement: Additional file 15 [file 1471-2164-7-62-s15.pdf]

| Species                           | REP sequence                                                 |
|-----------------------------------|--------------------------------------------------------------|
| <i>Pseudomonas syringae</i>       | GGACGCGGAGCGTCCAGAACGGCATGCCGACGCAGAGCGTCGCACGATAGT          |
| <i>Pseudomonas aeruginosa</i>     | GGTAGGGCGGATAACCGCTCGCGGTTATCCGCCG                           |
| <i>Pseudomonas putida</i>         | CCGGCCTCTTCGCGGGTAAGCCCGCTCCTACAGGG                          |
| <i>Escherichia coli</i>           | TGCCGGATGCGGGCGTAAACGCCTTATCCGGCCTAC                         |
| <i>Salmonella enterica typhi</i>  | TGCCGGATGGCGCTTCGCTTATCCGGCCTAC                              |
| <i>Shigella flexneri</i>          | TGCCGGATGGCGCTTCGCTTATCCGGCCTAC                              |
| <i>Salmonella typhimurium</i>     | TGCCGGATGGCGCTTCGCTTATCCGGCCTAC                              |
| <i>Neisseria meningitidis</i>     | CCGTCATTCCCACGAAAGTGGGAATCTAGAA                              |
| <i>Agrobacterium tumefaciens</i>  | ACGTCATCCTCGGGCTTGTCCTCCGAGGATCTGCAA                         |
| <i>Sinorhizobium meliloti</i>     | ACCTTCTCCCCGCAAGCGGGGCGAAGG                                  |
| <i>Deinococcus radiodurans</i>    | GGGAGAGGGCCTTGCGAAGCAAGGGGTGAGGG                             |
| <i>Rickettsia conorii</i>         | TATGTCATTCCCGGCAAAGCGGGAATCCAGT                              |
| <i>Mycobacterium tuberculosis</i> | GCGAGCAGACGAAAATCGCCATTTTCGTACCCGAAATGGGCGATTTTTCGCTCTGCTCGC |
